# Supplementary material
Source: PubMed Central journal article supplement (PMC8129123)

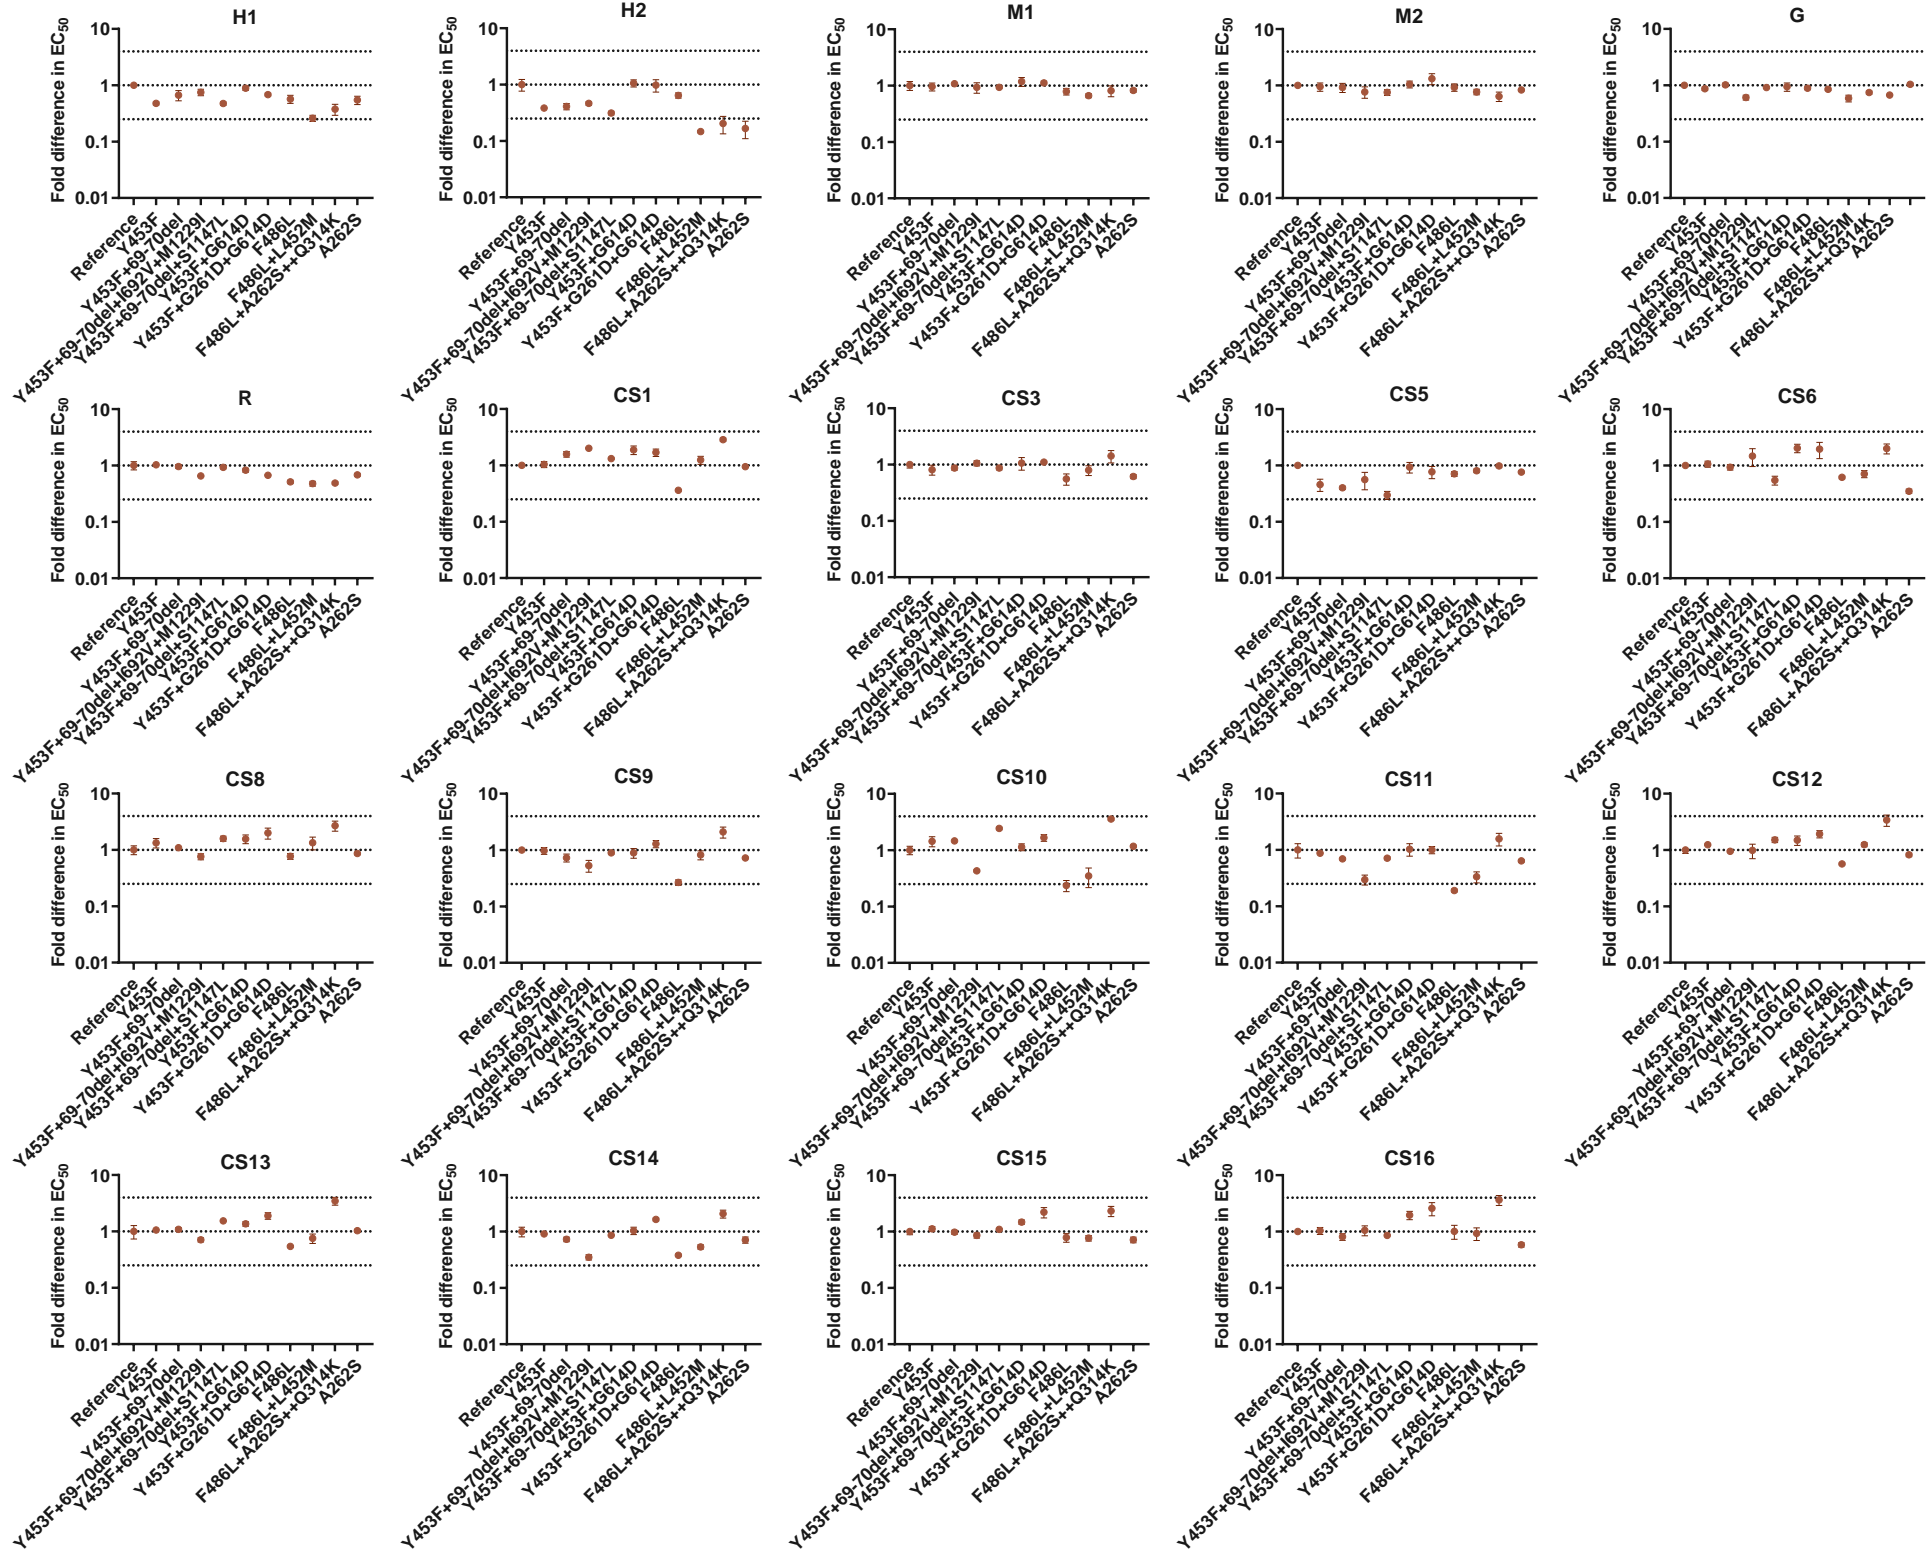

Supplement: 41392_2021_617_MOESM7_ESM.pdf [file 41392_2021_617_MOESM7_ESM.pdf]
